# Supplementary material for: The San1 Ubiquitin Ligase Avidly Recognizes Misfolded Proteins through Multiple Substrate Binding Sites
Source: MDPI journal article supplement (doi:10.3390/biom11111619), 2021-11-02
Supplement: s1 [file s1]

## Supplementary Material

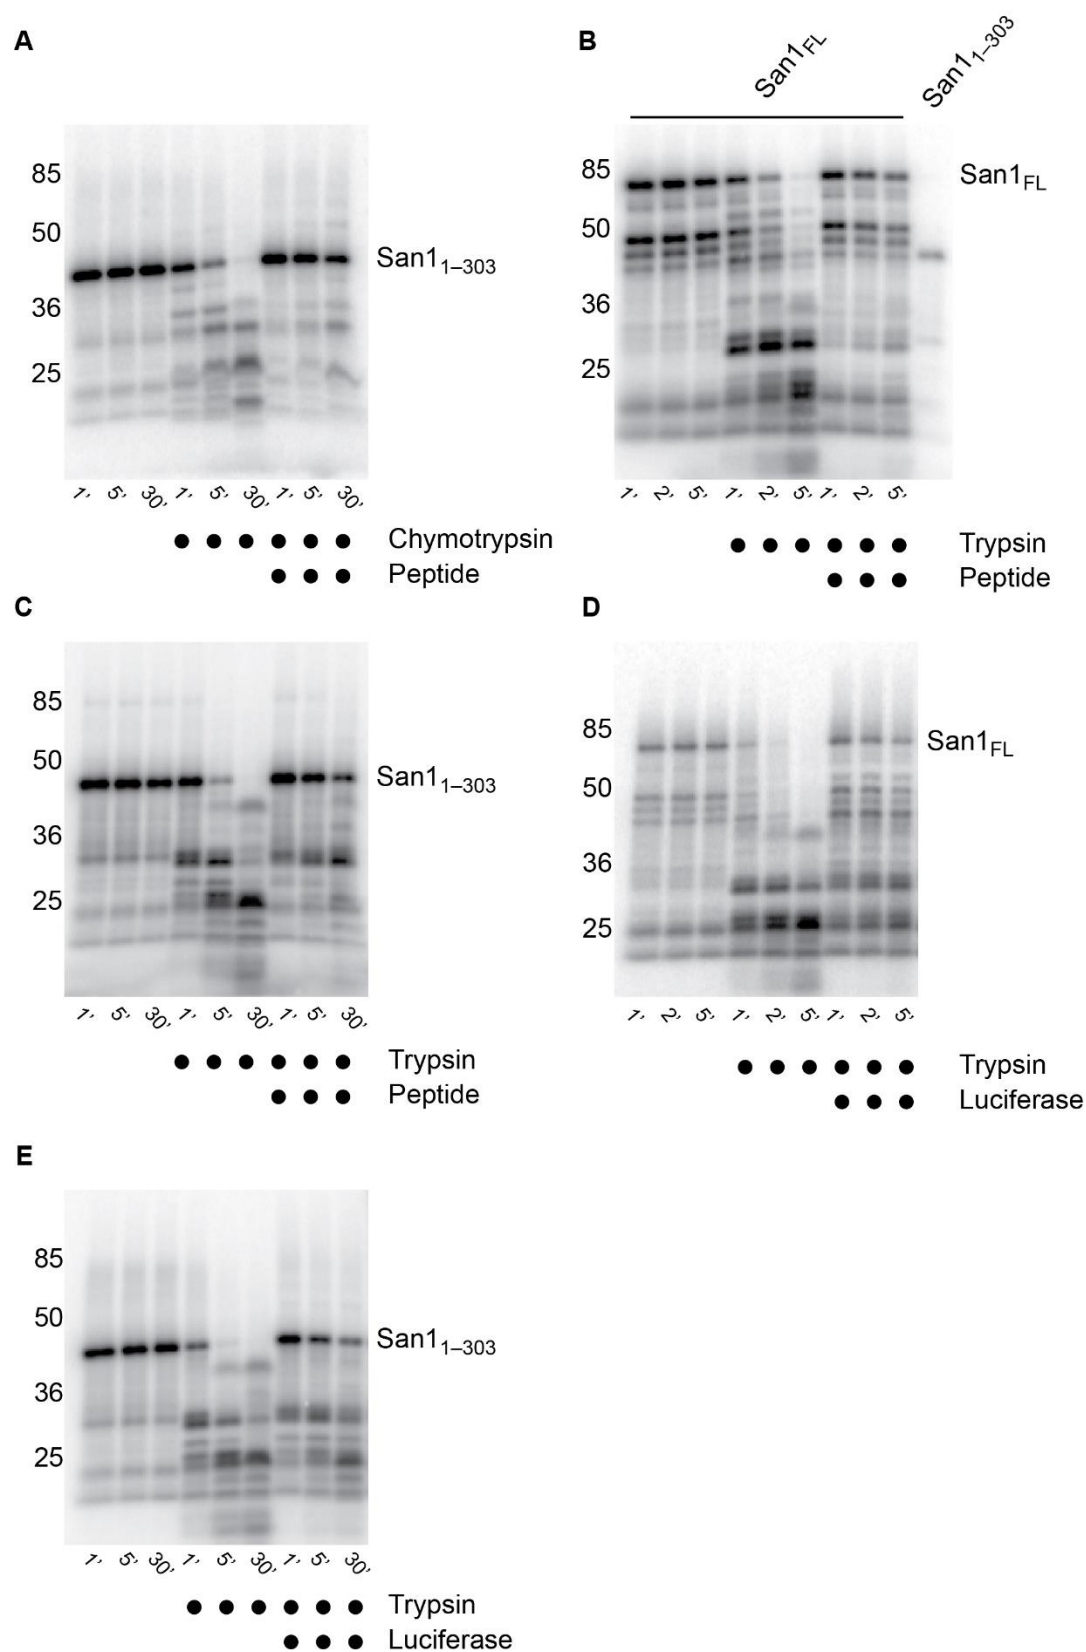

**Figure S1.** Peptide substrate significantly protects both full-length San1 and San1<sub>1-303</sub> from proteolysis.
